# Supplementary material for: Humidity-Mediated Anisotropic Proton Conductivity through the 1D Channels of Co-MOF-74
Source: MDPI journal article supplement (doi:10.3390/nano10071263), 2020-06-28
Supplement: s1 [file s1]

# Humidity-mediated Anisotropic Proton Conductivity through the 1D Channels of Co-MOF-74

## Supplementary Material

Ali Javed <sup>1</sup>, Ina Strauss <sup>2</sup>, Hana Bunzen <sup>3</sup>, Jürgen Caro <sup>2</sup>, and Michael Tiemann <sup>1</sup>

<sup>1</sup> Department of Chemistry, Paderborn University, 33098 Paderborn, Germany

<sup>2</sup> Institute of Physical Chemistry and Electrochemistry, Leibniz University Hannover, 30167 Hannover, Germany

<sup>3</sup> Institute of Physics, University of Augsburg, 86159 Augsburg, Germany

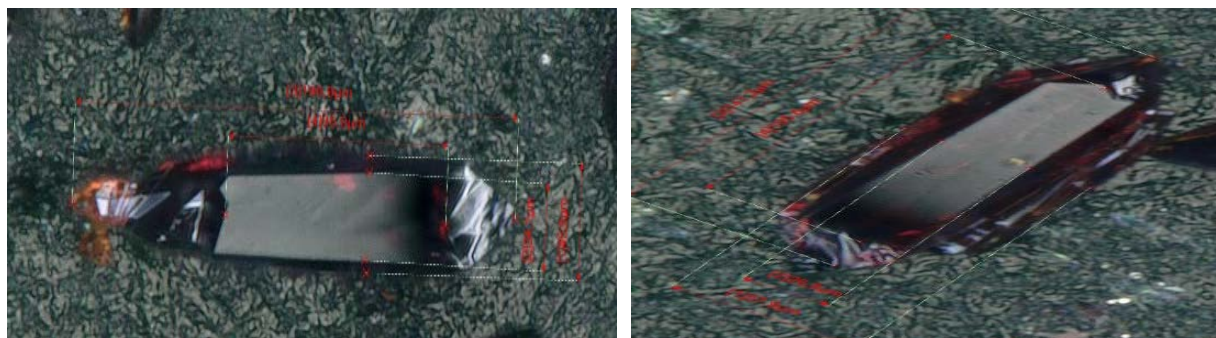

**Figure S1.** Microscopic images of two Co-MOF-74 crystals for the evaluation of the contact area in equation S1.

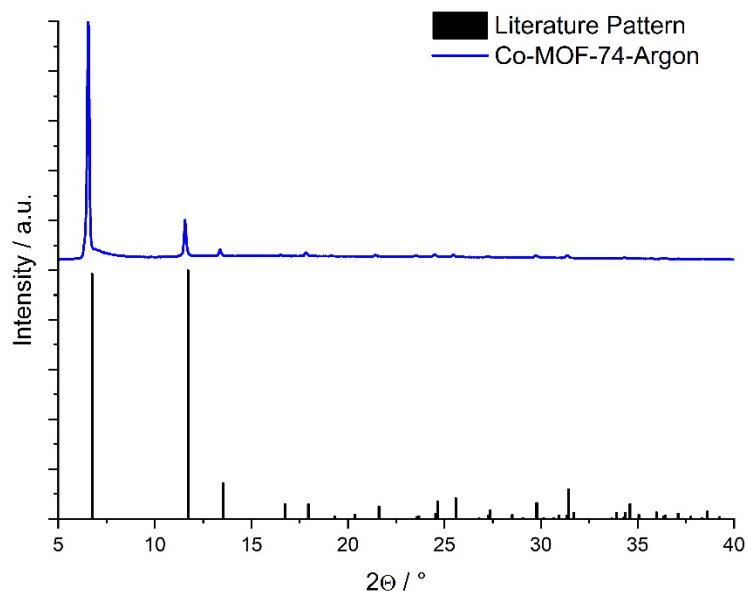

**Figure S2.** Experimental and simulated powder XRD pattern of Co-MOF-74 [1].

[1] Strauss, I.; Mundstock, A.; Hinrichs, D.; Himstedt, R.; Knebel, A.; Reinhardt, C.; Dorfs, D.; Caro, J. *Angew. Chemie Int. Ed.* **2018**, *57*, 7434–7439.

**Table S1.** Dimensions of Co-MOF-74 single crystals and contact lengths/widths with underlaying flat substrate, determined from Figure S1. The values are used as correcting factors for the assessment of the contact area in equation S1.

| crystal # | length              | contact length              | width               | contact width            |
|-----------|---------------------|-----------------------------|---------------------|--------------------------|
| 1         | 45.6 $\mu\text{m}$  | 34.1 $\mu\text{m}$ (74.8%)  | 190.9 $\mu\text{m}$ | 95 $\mu\text{m}$ (49.8%) |
| 2         | 141.2 $\mu\text{m}$ | 105.0 $\mu\text{m}$ (74.8%) | 57 $\mu\text{m}$    | 26 $\mu\text{m}$ (45.6%) |

**Equation S1.** Calculation of the proton conductivity  $\sigma$  from the measured proton resistance  $R$  and the contact area with the Pt electrodes ( $A$ : contact area between sample and the Pt electrode array;  $n$ : number of spacings between electrodes,  $D$ : inter-electrode distance (20  $\mu\text{m}$ ),  $d$ : electrode width (20  $\mu\text{m}$ ),  $a$ : width of crystal) [2].

$$\sigma = n \cdot (D / (R \cdot A)) = n \cdot (D / (R \cdot a \cdot d)) \quad (\text{S1})$$

**Table S2.** Fit results for the spectra in Figure 4.

|              | along micropore axis     | orthogonal to axis       |
|--------------|--------------------------|--------------------------|
| $\chi^2$     | 0.015                    | 0.014                    |
| $CPE-T$      | $1.8753 \times 10^{-11}$ | $1.4715 \times 10^{-11}$ |
| $CPE-P$      | 0.88579                  | 0.89969                  |
| $R / \Omega$ | $1.278 \times 10^7$      | $2.072 \times 10^7$      |

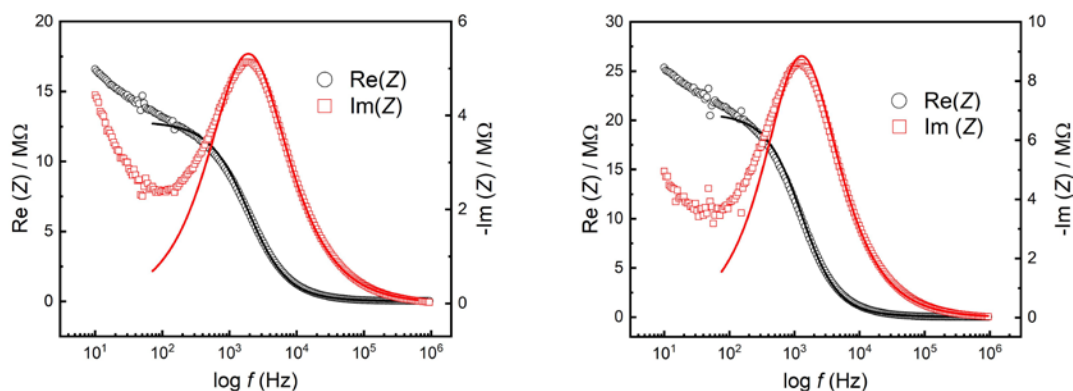

**Figure S3.** Real and imaginary parts of the impedance *vs.* frequency of a single Co-MOF-74 crystal in two different orientations relative to the contacting electrodes (25 °C, 92% r.h.): along (left) and orthogonal (right) to the micropore axis.

**Table S3.** All measured proton conductivity values of Co-MOF-74 crystals under variable conditions.

| sample name | proton current direction | $T / ^\circ\text{C}$ | r.h. / % | proton conductivity<br>$\sigma / \mu\text{S cm}^{-1}$ |
|-------------|--------------------------|----------------------|----------|-------------------------------------------------------|
| Co-74_1     | =                        | 25                   | 92       | 123                                                   |
|             | ≠                        | 25                   | 92       | 11.7                                                  |
| Co-74_2     | =                        | 21                   | 75       | 0.732                                                 |
|             | =                        | 21                   | 80       | 2.29                                                  |
|             | =                        | 21                   | 85       | 7.38                                                  |
|             | =                        | 21                   | 90       | 20.4                                                  |
|             | =                        | 22                   | 90       | 34.4                                                  |
| Co-74_3     | =                        | 26                   | 90       | 45.5                                                  |
|             | =                        | 30                   | 90       | 49.6                                                  |
|             | ≠                        | 21                   | 90       | 0.862                                                 |
| Co-74_4     | ≠                        | 24                   | 90       | 1.46                                                  |
|             | ≠                        | 27                   | 90       | 1.85                                                  |
|             | ≠                        | 30                   | 90       | 2.40                                                  |
|             | =                        | 30                   | 70       | 0.27                                                  |
| Co-74_5     | =                        | 30                   | 75       | 1.18                                                  |
|             | =                        | 30                   | 80       | 4.48                                                  |
|             | =                        | 30                   | 85       | 15.7                                                  |
|             | =                        | 30                   | 90       | 49.8                                                  |
|             | (=)                      | (30)                 | (95)     | (2590) <sup>2</sup>                                   |
|             | =                        | 40                   | 90       | 52.3                                                  |
|             | =                        | 50                   | 90       | 77.7                                                  |
|             | =                        | 60                   | 90       | 137                                                   |
|             | =                        | 60                   | 90       | 137                                                   |

<sup>1</sup> "=": along *c* axis; "≠": orthogonal    <sup>2</sup> (presumed bulk water condensation)
